# Supplementary material
Source: PubMed Central journal article supplement (PMC10205652)
Supplement: NIHMS1853958-supplement-Originally_accepted_SDC.pdf [file NIHMS1853958-supplement-Originally_accepted_SDC.pdf]

**Supplementary Table.** Concordance (C-statistic) of selected models with post-transplant mortality

| <b>Variable<sup>1</sup></b>           | <b>Concordance (95% CI)<sup>2</sup></b> |
|---------------------------------------|-----------------------------------------|
| Diabetes                              | 0.573 (0.503-0.643)                     |
| Chronological age                     | 0.657 (0.576-0.738)                     |
| ECG Age                               | 0.598 (0.521-0.675)                     |
| Age Gap with chronological age        | 0.660 (0.585-0.735)                     |
| Full model <sup>3</sup>               | 0.769 (0.710-0.829)                     |
| Full model <sup>3</sup> with diabetes | 0.770 (0.709-0.830)                     |
| Full model <sup>3</sup> with Age Gap  | 0.771 (0.713-0.829)                     |

<sup>1</sup>Variables obtained at time of kidney transplantation evaluation among subset of 74 patients who experienced post-transplant mortality; <sup>2</sup>CI = confidence interval; <sup>3</sup>Variables in the full model: chronological age, male sex, black race, body mass index, current or previous smoker, simultaneous pancreas/kidney transplant candidate, prior kidney transplant, dialysis dependence, duration of dialysis, hypertension, dyslipidemia, coronary artery disease, and Charlson Comorbidity Index (which includes myocardial infarction, congestive heart failure, peripheral vascular disease, cerebrovascular disease, dementia, chronic pulmonary disease, peptic ulcer disease, liver disease, diabetes with or without complications, hemiplegia or paraplegia, renal disease, malignancy, metastatic cancer, human immunodeficiency virus infection, rheumatologic disease)
